# Supplementary material for: Biological cell derived N-doped hollow porous carbon microspheres for lithium–sulfur batteries
Source: Royal Society of Chemistry journal article supplement (doi:10.1039/c6ta06164h), 2016-01-01
Supplement: c6ta06164h1.pdf [file c6ta06164h1.pdf]

Supporting Information for

**Biology cells derived N-doped hollow porous carbon microspheres  
for Lithium-Sulfur batteries**

Yanping Xie,<sup>a</sup> Liang Fang,<sup>b</sup> Hongwei Cheng,<sup>c</sup> Chenji Hu,<sup>a</sup> Hongbin Zhao,<sup>a\*</sup> Jiaqiang Xu,<sup>a</sup>  
Jianhui Fang,<sup>a\*</sup> Xionggang Lu,<sup>c</sup> Jiujun Zhan<sup>a,d\*</sup>

<sup>a</sup> College of Science, Shanghai University, 99 Shangda Road, Shanghai 200444, China

<sup>b</sup> Department of Physics, Institute of Low-dimensional Carbons and Device Physics, Shanghai University, Shanghai 200444, China

<sup>c</sup> School of Materials Science and Engineering, Shanghai University, Shanghai, 200444, China.

<sup>d</sup> NRC Energy, Mining and Environment, National Research Council of Canada, Vancouver, Canada

\*Corresponding author E-mail: hongbinzhao@shu.edu.cn; jhfang@shu.edu.cn; jiujun.zhang@nrc.gc.ca.

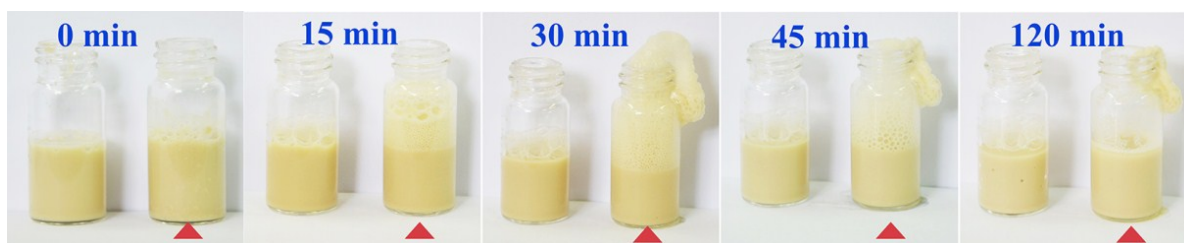

**Fig. S1** Cultivation process of yeast in glucose solution (marked in red) and without glucose solution at 0 min, 10min, 30 min, 45 min, 120 min. Without glucose, the yeast cells did not show observable change.

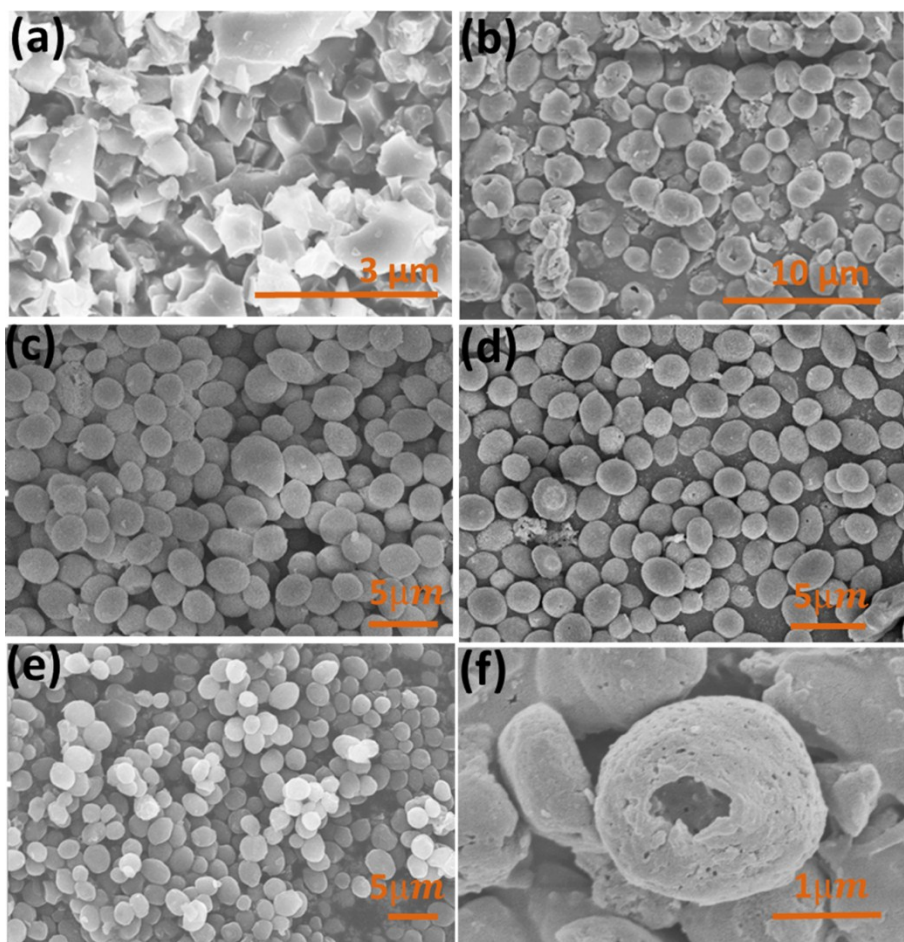

**Fig. S2** SEM images of products without peroxidation process in air (a); hollow carbon spheres with pure water as solvent without GA (b); From the SEM images, almost all of the NHCM-5, NHCM-3, and NHPCM-5 could be the integral elliptical morphology (c-e); SEM image of NHPCM-5 after violent ball-milling (f).

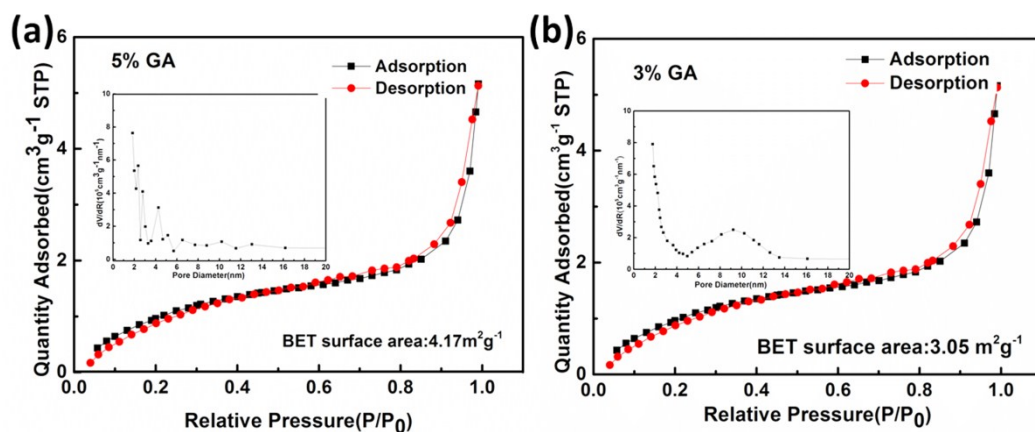

**Fig. S3** N<sub>2</sub> adsorption/desorption isotherms of NHPCM-5 (a) and NHPCM-3 (b). The insets are pore-size distributions.

**Table S1.** Specific surface area and Pore volume of NHPCM-3 and NHPCM-5.

| Sample  | S <sub>BET</sub> <sup>[a]</sup><br>(m <sup>2</sup> /g) | V <sub>micro</sub> <sup>[b]</sup><br>(cm <sup>3</sup> /g) | V <sub>meso</sub> <sup>[c]</sup><br>(cm <sup>3</sup> /g) | V <sub>total</sub> <sup>[c]</sup><br>(cm <sup>3</sup> /g) | V <sub>micro</sub> <sup>[b]</sup> /V <sub>total</sub> <sup>[c]</sup> |
|---------|--------------------------------------------------------|-----------------------------------------------------------|----------------------------------------------------------|-----------------------------------------------------------|----------------------------------------------------------------------|
| NHPCM-3 | 615                                                    | 0.30                                                      | 0.32                                                     | 0.62                                                      | 0.48                                                                 |
| NHPCM-5 | 721                                                    | 0.57                                                      | 0.29                                                     | 0.86                                                      | 0.66                                                                 |

[a] BET specific surface area [b] microporous volume [c] Total pore volume

**Table S2.** Elemental analysis of pristine yeast, NHCM, NHPCM and NHPCM@S composites.

| Samples        | C (wt %) | N (wt%) | H (wt%) | N/C (at/at) |
|----------------|----------|---------|---------|-------------|
| Pristine yeast | 44.3     | 7.56    | 6.86    | 0.14        |
| NHCM           | 68.69    | 6.91    | 7.43    | 0.08        |
| NHPCM          | 76.10    | 9.08    | 1.84    | 0.10        |
| NHPCM@65%S     | 26.08    | 3.24    | 0.72    | 0.10        |
| NHPCM@75%S     | 19.10    | 2.45    | 0.53    | 0.10        |

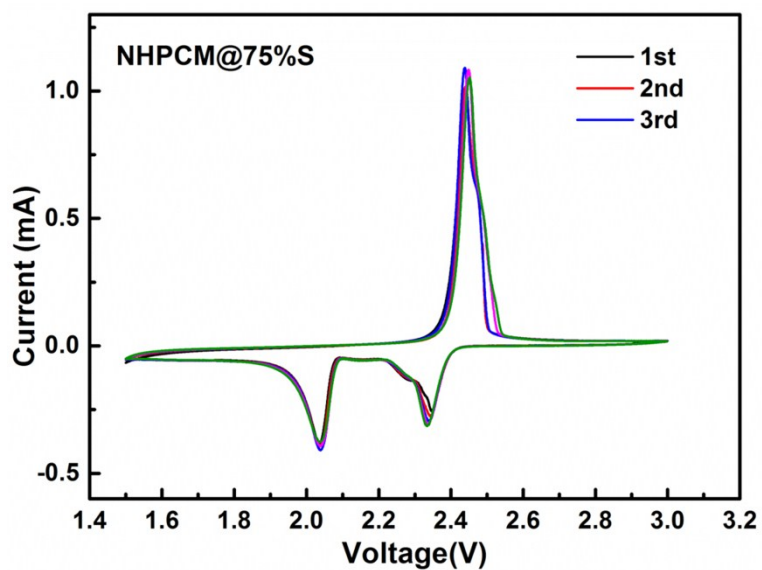

**Fig. S4** Cyclic voltammograms of NHPCM@75%S composite at a sweep rate of  $0.1 \text{ mV s}^{-1}$  between 1.5 and 3.0 V.

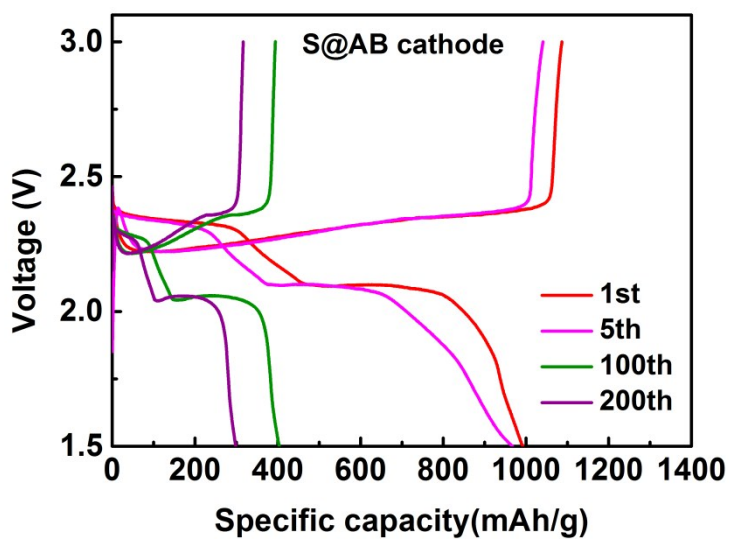

**Fig. S5** Discharge/charge voltage profiles ( $0.1 \text{ C}$ ) at different cycles of S@AB-65%S cathode.

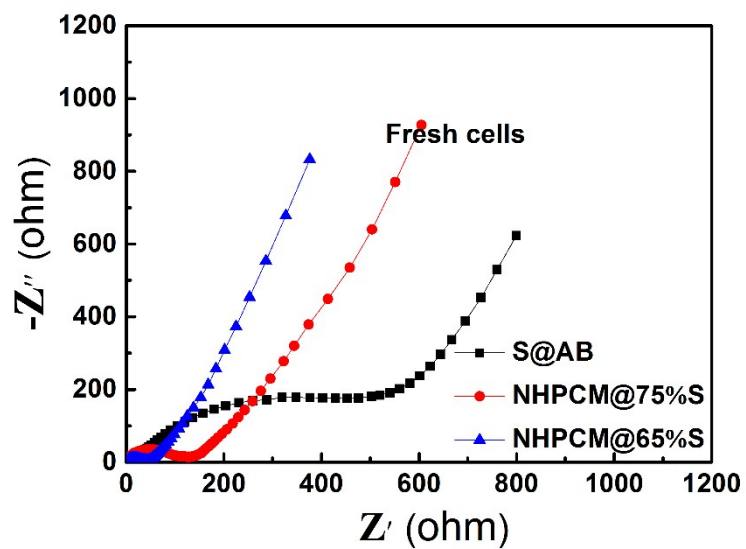

**Fig. S6** The electrochemical impedance spectra of NHPCM@S and S@AB cathodes before cycle.

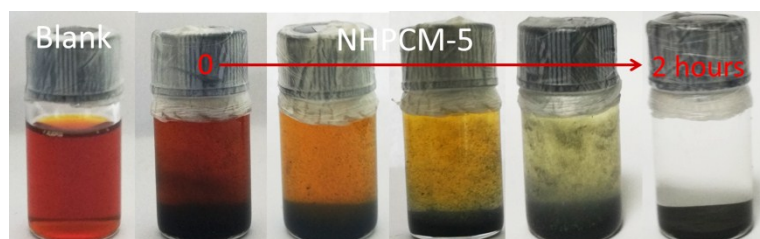

**Fig. S7** Visual photos of a  $\text{Li}_2\text{S}_6/\text{DOL-DME}$  solution and NHPCM-5 soaked in  $\text{Li}_2\text{S}_6$  solution within 2 hours.
